# Supplementary material for: PDGFA gene rs9690350 polymorphism increases biliary atresia risk in Chinese children
Source: Oxford University Press journal article supplement (doi:10.1042/bsr20200068), 2020-07-01
Supplement: bsr-2020-0068_supp.pdf [file bsr-2020-0068_supp.pdf]

## Multi-tissue eQTL Comparison

ENSG00000197461.9 PDGFA and rs9690350 eQTL (Meta Analysis RE2 P-Value: 9.80909e-45)

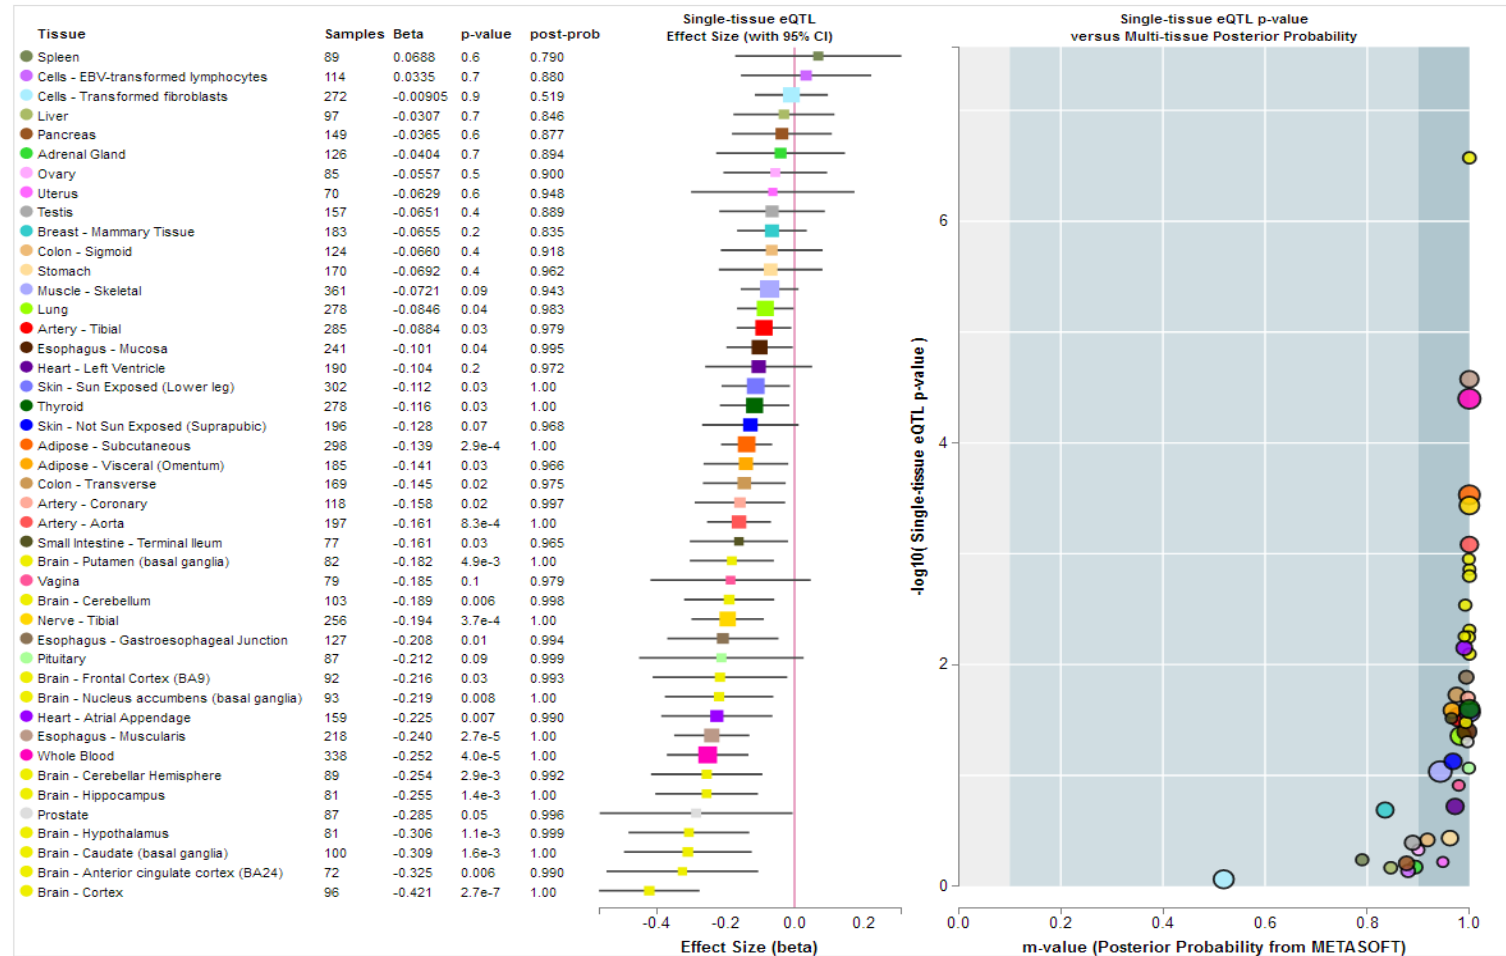

**Supplementary Figure 1.** SNP rs9690350 played as an expression quantitative locus (eQTL) with *PDGFA* across different tissues in human, especially in Central nervous system using GTEX tool (<https://www.gtexportal.org/home/>).

**Supplementary Table 1.** The detailed clinical information of the subjects in this study

| Variable                     | Cases (n=506) | %      | Controls (n=1473) | %      |
|------------------------------|---------------|--------|-------------------|--------|
| Age (Months)                 | 2.088±1.934   |        | 18.61±19.75       |        |
| ≤3                           | 470           | 92.89% | 521               | 35.37% |
| >3                           | 36            | 7.11%  | 952               | 64.63% |
| Gender                       |               |        |                   |        |
| Females                      | 214           | 42.29% | 506               | 34.35% |
| Males                        | 292           | 57.71% | 967               | 65.65% |
| Clinical manifestation       |               |        |                   |        |
| Cystic biliary atresia (CBA) | 44            | 8.70%  |                   |        |
| non-CBA                      | 462           | 91.30% |                   |        |

**Supplementary Table 2.** The functional annotation of candidate SNP rs9690350 by SCAN ([http://www.scandb.org/newinterface/index\\_v1.html](http://www.scandb.org/newinterface/index_v1.html)) and Regulome DB (<http://regulomedb.org/>)

| SNP       | CHR | A1/A2 | SCAN  |                     |                     |                | Regulome DB                                              |            |
|-----------|-----|-------|-------|---------------------|---------------------|----------------|----------------------------------------------------------|------------|
|           |     |       | gene  | feature             | left_gene           | right_gene     | hits                                                     | score      |
| rs9690350 | 7   | C/G   | PDGFA | intron[NM_033023.3] | <i>LOC100132080</i> | <i>PRKAR1B</i> | TF binding + any motif + DNase<br>Footprint + DNase peak | <b>2b*</b> |
